# Supplementary material
Source: Springer Nature journal article supplement (https://www.springermedizin.de/resource/supplementary/13075_2012_3831_MOESM2_ESM.pdf/9695426)
Supplement: MOESM2 [file 9695426]

|                 |              | Absence of typical RA erosion on radiographs |                      |                      | Presence of typical RA erosions on radiographs |                      |                      |          |                                                                                                                                                                                                                                                                                                                                                                                                                                                                                                                                                         |
|-----------------|--------------|----------------------------------------------|----------------------|----------------------|------------------------------------------------|----------------------|----------------------|----------|---------------------------------------------------------------------------------------------------------------------------------------------------------------------------------------------------------------------------------------------------------------------------------------------------------------------------------------------------------------------------------------------------------------------------------------------------------------------------------------------------------------------------------------------------------|
|                 |              | SJC < 14                                     | 14 ≤ SJC < 20        | SJC ≥ 20             | SJC < 14                                       | 14 ≤ SJC < 20        | SJC ≥ 20             |          |                                                                                                                                                                                                                                                                                                                                                                                                                                                                                                                                                         |
| ACPA positivity | CRP ≥ 35     | 0.12<br>[0.05; 0.23]                         | 0.16<br>[0; 0.91]    | 0.33<br>[0.10; 0.84] | 0.34<br>[0.17; 0.54]                           | 0.40<br>[0.16; 0.67] | 0.64<br>[0.28; 0.88] | RRP Risk | <div style="display: flex; flex-direction: column; align-items: center;"> <div style="width: 15px; height: 15px; background-color: red; margin-bottom: 5px;"></div> <div>≥ 50%</div> <div style="width: 15px; height: 15px; background-color: orange; margin-bottom: 5px;"></div> <div>25 ≤ &lt; 50%</div> <div style="width: 15px; height: 15px; background-color: yellow; margin-bottom: 5px;"></div> <div>10 ≤ &lt; 25%</div> <div style="width: 15px; height: 15px; background-color: green; margin-bottom: 5px;"></div> <div>&lt; 10%</div> </div> |
|                 | 4 ≤ CRP < 35 | 0.12<br>[0.07; 0.19]                         | 0.16<br>[0; 0.9]     | 0.32<br>[0.09; 0.63] | 0.33<br>[0.19; 0.50]                           | 0.40<br>[0.18; 0.52] | 0.64<br>[0.24; 0.88] |          |                                                                                                                                                                                                                                                                                                                                                                                                                                                                                                                                                         |
|                 | CRP < 4      | 0.06<br>[0.01; 0.13]                         | 0.07<br>[0.01; 0.24] | 0.17<br>[0.03; 0.52] | 0.18<br>[0.04; 0.35]                           | 0.22<br>[0.04; 0.52] | 0.43<br>[0.07; 0.82] |          |                                                                                                                                                                                                                                                                                                                                                                                                                                                                                                                                                         |
| ACPA negativity | CRP ≥ 35     | 0.04<br>[0.01; 0.10]                         | 0.06<br>[0.01; 0.16] | 0.14<br>[0.03; 0.33] | 0.15<br>[0.04; 0.31]                           | 0.18<br>[0.05; 0.43] | 0.37<br>[0.08; 0.68] |          |                                                                                                                                                                                                                                                                                                                                                                                                                                                                                                                                                         |
|                 | 4 ≤ CRP < 35 | 0.04<br>[0.01; 0.08]                         | 0.06<br>[0.01; 0.15] | 0.14<br>[0.03; 0.33] | 0.14<br>[0.04; 0.28]                           | 0.18<br>[0.05; 0.44] | 0.37<br>[0.08; 0.69] |          |                                                                                                                                                                                                                                                                                                                                                                                                                                                                                                                                                         |
|                 | CRP < 4      | 0.02<br>[0; 0.04]                            | 0.03<br>[0; 0.08]    | 0.07<br>[0.01; 0.19] | 0.07<br>[0.02; 0.15]                           | 0.08<br>[0.01; 0.24] | 0.20<br>[0.02; 0.52] |          |                                                                                                                                                                                                                                                                                                                                                                                                                                                                                                                                                         |
